# Supplementary material
Source: MDPI journal article supplement (https://www.mdpi.com/2071-1050/14/19/12595)
Supplement: s1 [file s1]

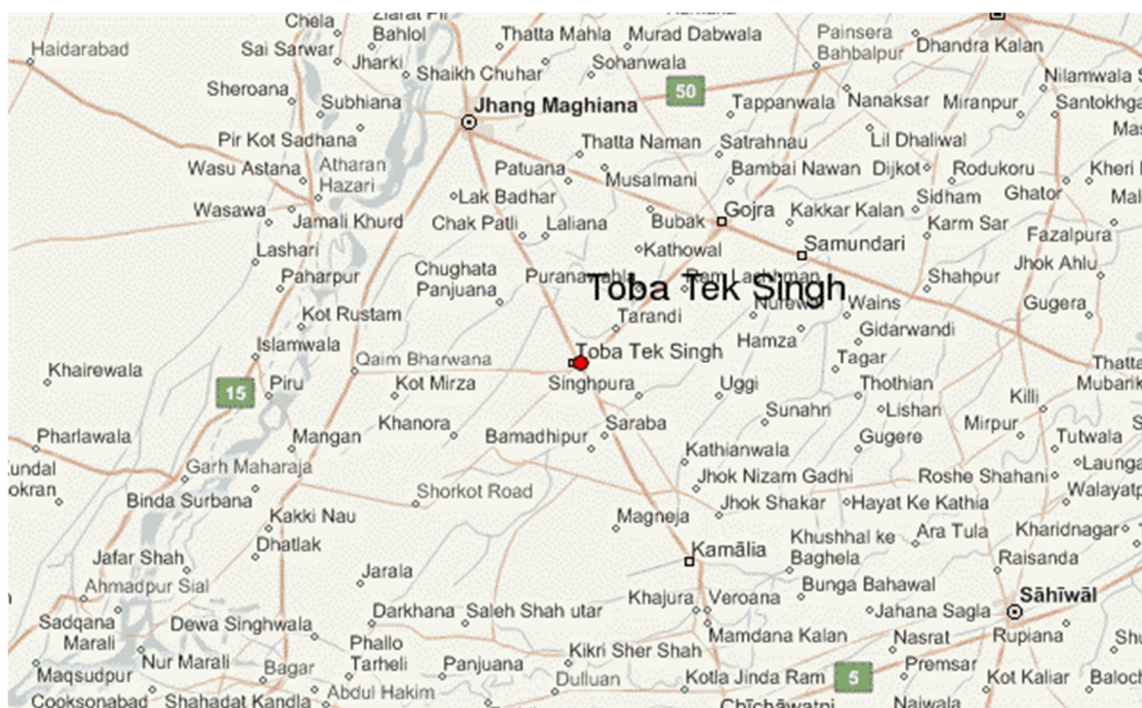

**Figure S1.** Map of the study district (Toba Tek Singh), Punjab, Pakistan.

**Table S1.** Analysis of variance for Cd metal in soil, in forages and in animal blood, hair and faces.

| Source                           | Degree of freedom | Mean Square         | Sig   |
|----------------------------------|-------------------|---------------------|-------|
| <b>SOIL</b>                      |                   |                     |       |
| Site                             | 2                 | 3.629***            | 0.001 |
| Soil                             | 4                 | 1.021*              | 0.013 |
| Site x soil                      | 8                 | 0.507**             | 0.097 |
| Error                            | 30                | 0.267               |       |
| <b>FORAGE</b>                    |                   |                     |       |
| Site                             | 2                 | 9.455***            | 0.001 |
| Forage                           | 4                 | 1.937**             | 0.013 |
| Site x forage                    | 8                 | 0.713ns             | 0.097 |
| <b>ANIMAL BLOOD, HAIR, FECES</b> |                   |                     |       |
| Site                             | 2                 | 19.663***           | 0.001 |
| Animal                           | 2                 | 0.602 <sup>ns</sup> | NS    |
| Source                           | 2                 | 0.614 <sup>ns</sup> | NS    |
| Site x Animal                    | 4                 | 0.627 <sup>ns</sup> | NS    |
| Site x Source                    | 4                 | 0.97 <sup>ns</sup>  | NS    |
| Animal x Source                  | 4                 | 0.817 <sup>ns</sup> | NS    |
| Site x Animal x Source           | 8                 | 0.729 <sup>ns</sup> | NS    |

ns insignificant. \* Significant at 0.05 level, \*\* and \*\*\* Significant at 0.01 and 0.001 level.

**Table S2.** Analysis of Variance for Cu metal in soil, in forages, in Animal blood, Hair and Faces.

| Source                           | Degree of freedom | Mean Square |
|----------------------------------|-------------------|-------------|
| <b>SOIL</b>                      |                   |             |
| Site                             | 2                 | 37.001***   |
| Soil                             | 4                 | 0.802ns     |
| Site x soil                      | 8                 | 2.047ns     |
| <b>FORAGE</b>                    |                   |             |
| Site                             | 2                 | 86.37***    |
| Forage                           | 4                 | 4.873ns     |
| <b>ANIMAL BLOOD, HAIR, FECES</b> |                   |             |

|                               |   |                     |
|-------------------------------|---|---------------------|
| <b>Site</b>                   | 2 | 20.164***           |
| <b>Animal</b>                 | 2 | 0.461 <sup>ns</sup> |
| <b>Source</b>                 | 2 | 16.571***           |
| <b>Site x Animal</b>          | 4 | 1.13 <sup>ns</sup>  |
| <b>Site x Source</b>          | 4 | 0.431 <sup>ns</sup> |
| <b>Animal x Source</b>        | 4 | 1.066 <sup>ns</sup> |
| <b>Site x Animal x Source</b> | 8 | 0.893 <sup>ns</sup> |
| <b>Site x forage</b>          | 8 | 6.392**             |

ns insignificant. \*Significant at 0.05 level, \*\* and \*\*\* Significant at 0.01 and 0.001 level.

**Table S3.** TREATMENT DETAILS .

| <b>Forages</b>                                | <b>Cattles</b> | <b>Body organs</b> | <b>Sites/Location</b> | <b>Metals</b> | <b>Measurements</b>     |       |
|-----------------------------------------------|----------------|--------------------|-----------------------|---------------|-------------------------|-------|
| <i>Sorghum bicolor</i> Kuntze                 | Buffalo        | Blood              | Site I                | Cd            | Bioconcentration Factor | BCF   |
| <i>Sesbania bispinosa</i> (Jacq.)<br>W. Wight | Cow            | Hair               | Site II               | Cu            | Pollution Load Index    | PLI   |
| <i>Cynodon dactylon</i> (L.)<br>Pers.,        | Sheep          | Feces              | Site III              |               | Enrichment Factor       | EF    |
| <i>Suaeda fruticosa</i> (L.)<br>Forssk.       |                |                    |                       |               | Daily Intake Of Metal   | DIM   |
| <i>Tribulus terrestris</i> L.                 |                |                    |                       |               | Health Risk Index       | HRI   |
|                                               |                |                    |                       |               | Milli Gram Per kg       | mg/kg |
|                                               |                |                    |                       |               | Milli Gram Per Liquid   | mg/l  |
